# Supplementary material for: Phytochemicals and In Vitro Bioactivities of Aqueous Ethanolic Extracts from Common Vegetables in Thai Food
Source: MDPI journal article supplement (doi:10.3390/plants10081563), 2021-07-29

# Supplementary materials

## Phytochemicals and *In vitro* Bioactivities of Aqueous Ethanolic Extracts from Common Vegetables in Thai Food

Uthaiwan Suttisansanee <sup>1,2</sup>, Parunya Thiyajai <sup>1,2</sup>, Parisut Chalermchaiwat <sup>3</sup>, Khanitha Wongwathanarat <sup>4</sup>, Kanchana Pruesapan <sup>5</sup>, Somsri Charoenkiatkul <sup>1</sup> and Piya Temviriyakul <sup>1,2,\*</sup>

<sup>1</sup> Institute of Nutrition, Mahidol University, Salaya, Phuttamonthon, Nakhon Pathom 73170, Thailand; uthaiwan.sut@mahidol.ac.th (U.S.); parunya.thy@mahidol.ac.th (P.Th.); somsri.chr@mahidol.ac.th (S.C.); piya.tem@mahidol.ac.th (P.T.)

<sup>2</sup> Food and Nutrition Academic and Research Cluster, Institute of Nutrition, Mahidol University, Salaya, Phuttamonthon, Nakhon Pathom 73170, Thailand

<sup>3</sup> Food and Nutrition Program, Department of Home Economics, Faculty of Agriculture, Kasetsart University Bangkok 10900, Thailand; fagrp-sch@ku.ac.th (P.C.)

<sup>4</sup> Biotechnology Research and Development Office, Department of Agriculture, Ministry of Agriculture and Cooperatives, Bangkok 10900, Thailand; kwongwath@yahoo.com (K.W.)

<sup>5</sup> Plant Varieties Protection Division, Department of Agriculture, Ministry of Agriculture and Cooperatives, Bangkok 10900, Thailand; kpruesapan@gmail.com (K.P.)

\* Correspondence: piya.tem@mahidol.ac.th; Tel.: +66-(0)-2800-2380 (ext. 326)

## Supplementary Table S1:

The cultivation area, voucher specimen, harvesting time and physical appearance of the edible part of the samples.

| Scientific name<br>and cultivation area                                                                                 | Voucher specimen<br>and harvesting time | Physical appearance of the edible part                                                                                          |
|-------------------------------------------------------------------------------------------------------------------------|-----------------------------------------|---------------------------------------------------------------------------------------------------------------------------------|
| <i>Allium cepa</i> Aggregatum Group<br>from Nong Phai subdistrict,<br>Mueang Si Sa Ket district, Si Sa Ket,<br>Thailand | BK069175-7/<br>80 days after planting   |  <p>— 1 cm.</p> <p>Edible part: bulbs</p>     |
| <i>Allium fistulosum</i> L.<br>from Chai Chumphon subdistrict,<br>Laplae district, Uttaradit, Thailand                  | BK069094/<br>45 days after seeding      |  <p>— 1 cm.</p> <p>Edible part: leaves</p>  |
| <i>Allium sativum</i> L.<br>from Khayung subdistrict,<br>Uthumphon Phisai district, Si Sa<br>Ket, Thailand              | BK069066/<br>90 days after planting     |  <p>— 1 cm.</p> <p>Edible parts: bulbs</p> |

## Supplementary Table S1 (Cont.):

The cultivation area, voucher specimen, harvesting time and physical appearance of the edible part of the samples.

| Scientific name<br>and cultivation area                                                                              | Voucher specimen<br>and harvesting time  | Physical appearance and edible part                                                                                                                                                                     |
|----------------------------------------------------------------------------------------------------------------------|------------------------------------------|---------------------------------------------------------------------------------------------------------------------------------------------------------------------------------------------------------|
| <i>Citrus hystrix</i> DC.<br>from Chorakhe Phueak subdistrict,<br>Dan Makham Tia district,<br>Kanchanaburi, Thailand | BK069139-42/<br>150 days after flowering | <br><br>Edible part: fruit peel |
| <i>Coriandrum sativum</i> L.<br>from Ban Hong subdistrict, Ban<br>Hong district, Lamphun, Thailand                   | BK069108-10/<br>45 days after seeding    | <br>Edible part: leaves                                                                                            |

## Supplementary Table S1 (Cont.):

The cultivation area, voucher specimen, harvesting time and physical appearance of the edible part of the samples.

| Scientific name<br>and cultivation area                                                                               | Voucher specimen<br>and harvesting time  | Physical appearance of the edible part                                                                                          |
|-----------------------------------------------------------------------------------------------------------------------|------------------------------------------|---------------------------------------------------------------------------------------------------------------------------------|
| <i>Cymbopogon citratus</i> (DC.) Stapf<br>from Thoet Thai subdistrict, Mae Fa<br>Luang district, Chiang Rai, Thailand | BK069099-101/<br>180 days after planting |  <p>– 1 cm.</p> <p>Edible part: stalk</p>   |
| <i>Eryngium foetidum</i> L.<br>from Ban Hong subdistrict, Ban<br>Hong district, Lamphun, Thailand                     | BK069114-6/<br>120 days after seeding    |  <p>– 1 cm.</p> <p>Edible part: leaves</p> |

## Supplementary Table S1 (Cont.):

The cultivation area, voucher specimen, harvesting time and physical appearance of the edible part of the samples.

| Scientific name<br>and cultivation area                                                                                                                          | Voucher specimen<br>and harvesting time    | Physical appearance of the edible part                                                                                                |
|------------------------------------------------------------------------------------------------------------------------------------------------------------------|--------------------------------------------|---------------------------------------------------------------------------------------------------------------------------------------|
| <i>Psophocarpus tetragonolobus</i> (L.) DC.<br>From Nong Ya Lat subdistrict, Kan-<br>tharalak district, Si Sa Ket, Thailand                                      | BK069105-7/<br>10-14 days after flowering  |  <p>— 1 cm.</p> <p>Edible part: whole fruits</p>   |
| <i>Senegalia pennata</i> subsp. <i>insuavis</i><br>(Lace) Maslin, Seigler & Ebinger<br>from Phai Luang subdistrict,<br>Taphan Hin district, Phichit,<br>Thailand | BK069089-91/<br>10-15 days after shooting  |  <p>— 1 cm.</p> <p>Edible part: young leaves</p> |
| <i>Solanum melongena</i> 'Kermit'<br>from Thung Thong subdistrict, Tha<br>Muang district, Kanchanaburi,<br>Thailand                                              | BK069148-50/<br>15-20 days after flowering |  <p>— 1 cm.</p> <p>Edible part: whole fruits</p>  |

## Supplementary Table S2:

The percentage of edible part and color value of fresh samples. The color value was determined using a ColorFlex EZ spectrophotometer and expressed as CIELAB units (L\* represents dark (0) to white (100) colors, a\* represents green (-) to red (+) colors, and b\* represents blue (-) to yellow (+) colors).

| Samples                                                                             | Color value  |                |                | % of edible part |
|-------------------------------------------------------------------------------------|--------------|----------------|----------------|------------------|
|                                                                                     | L*           | a*             | b*             |                  |
| <i>Allium cepa</i> Aggregatum Group                                                 | 38.13 ± 4.38 | 6.10 ± 1.75    | (-1.19) ± 1.26 | 78.70 ± 5.47     |
| <i>Allium fistulosum</i> L.                                                         | 30.99 ± 0.61 | (-4.38) ± 0.14 | 7.57 ± 0.30    | 94.94 ± 0.42     |
| <i>Allium sativum</i> L.                                                            | 46.36 ± 0.64 | (-0.62) ± 0.15 | 10.23 ± 0.46   | 83.41 ± 1.21     |
| <i>Citrus hystrix</i> DC.                                                           | 29.62 ± 0.96 | (-4.14) ± 0.60 | 10.99 ± 1.60   | 27.63 ± 0.08     |
| <i>Coriandrum sativum</i> L.                                                        | 30.04 ± 1.25 | (-4.95) ± 0.24 | 11.35 ± 0.53   | 82.11 ± 3.26     |
| <i>Cymbopogon citratus</i> (DC.) Stapf                                              | 24.90 ± 0.52 | 0.90 ± 0.11    | 9.88 ± 0.08    | 43.58 ± 4.95     |
| <i>Eryngium foetidum</i> L.                                                         | 30.63 ± 0.36 | (-5.02) ± 0.07 | 11.15 ± 0.67   | 58.29 ± 7.94     |
| <i>Psophocarpus tetragonolobus</i> (L.) DC.                                         | 34.15 ± 0.76 | (-4.80) ± 0.14 | 15.45 ± 0.28   | 94.28 ± 0.10     |
| <i>Senegalia pennata</i> subsp. <i>insuavis</i> (Lace)<br>Maslin, Seigler & Ebinger | 31.28 ± 0.01 | (-11.4) ± 0.01 | 31.05 ± 0.05   | 35.69 ± 1.56     |
| <i>Solanum melongena</i> 'Kermit'                                                   | 32.80 ± 3.03 | (-4.45) ± 0.18 | 10.01 ± 1.96   | 92.06 ± 0.49     |

## Supplementary Table S3:

The validation parameters of phenolics detection using HPLC analysis.

| Standards               | Linear range (µg/mL) | Linear regression equation | Correlation coefficient (R <sup>2</sup> ) | LOD (µg/mL) | LOQ (µg/mL) | RSD (%) |
|-------------------------|----------------------|----------------------------|-------------------------------------------|-------------|-------------|---------|
| <b>Phenolic acids</b>   |                      |                            |                                           |             |             |         |
| Gallic acid             | 0.78-200.00          | $y = 38.814x + 43.836$     | 0.9998                                    | 2.66        | 8.07        | 1.37    |
| 4-Hydroxybenzoic acid   | 0.39-100.00          | $y = 54.999x - 11.469$     | 0.9994                                    | 0.32        | 0.98        | 1.86    |
| Caffeic acid            | 0.39-100.00          | $y = 76.614x + 15.797$     | 0.9998                                    | 0.59        | 1.78        | 1.70    |
| Chlorogenic acid        | 0.39-100.00          | $y = 45.107x - 8.1659$     | 1.0000                                    | 0.03        | 0.10        | 1.59    |
| Ferulic acid            | 0.56-142.86          | $y = 42.477x - 16.212$     | 0.9990                                    | 0.49        | 1.48        | 1.58    |
| <i>p</i> -Coumaric acid | 0.56-142.86          | $y = 44.809x - 22.611$     | 0.9991                                    | 0.57        | 1.73        | 1.97    |
| Sinapic acid            | 0.39-100.00          | $y = 63.807x + 10.841$     | 1.0000                                    | 0.22        | 0.68        | 1.01    |
| Syringic acid           | 0.65-166.67          | $y = 37.286x - 24.557$     | 0.9990                                    | 1.12        | 3.41        | 1.63    |
| Vanillic acid           | 0.65-333.33          | $y = 29.028x + 30.817$     | 0.9999                                    | 2.19        | 6.64        | 1.99    |
| <b>Flavonoids</b>       |                      |                            |                                           |             |             |         |
| Apigenin                | 0.39-200.00          | $y = 40.778x + 34.994$     | 0.9999                                    | 2.22        | 6.73        | 0.44    |
| Hesperidin              | 0.65-333.33          | $y = 24.424x + 76.057$     | 0.9990                                    | 2.56        | 7.77        | 0.64    |
| Kaempferol              | 0.65-166.67          | $y = 47.952x + 43.855$     | 0.9999                                    | 0.14        | 0.42        | 0.12    |
| Luteolin                | 0.65-166.67          | $y = 44.717x + 28.899$     | 0.9999                                    | 1.19        | 3.62        | 0.52    |
| Myricetin               | 0.65-166.67          | $y = 43.048x + 16.879$     | 0.9999                                    | 0.37        | 1.12        | 0.32    |
| Naringenin              | 0.65-333.33          | $y = 30.205x + 46.292$     | 0.9999                                    | 0.46        | 1.38        | 0.45    |
| Quercetin               | 0.65-166.67          | $y = 46.975x + 38.753$     | 0.9999                                    | 0.19        | 0.58        | 0.10    |
| Isorhamnetin            | 1.30-333.33          | $y = 16.302x + 46.483$     | 0.9992                                    | 0.45        | 1.37        | 0.39    |

LOD : limit of quantitation; LOD : limit of detection; RSD : and relative standard deviation

## Supplementary Figure S1:

High-performance liquid chromatograms showing retention time ( $R_t$ ) of (A) authentic standards including gallic acid (4.8 min), 4-hydroxybenzoic acid (12.1 min), chlorogenic acid (13.3 min), vanillic acid (14.6 min), caffeic acid (15.3 min), syringic acid (16.5 min), *p*-coumaric acid (22.4 min), ferulic acid (22.5 min) and sinapic acid (26.5 min), (B.) *A. cepa*, (C.) *A. fistulosum*, (D.) *A. sativum*, (E.) *Ci. hystrix*, (F.) *Co. sativum*, (G.) *Cy. citratus*, (H.) *E. foetidum*, (I.) *P. tetragonolobus*, (J.) *Se. pennata*, and (K.) *So. melongena* detected at 280 nm.

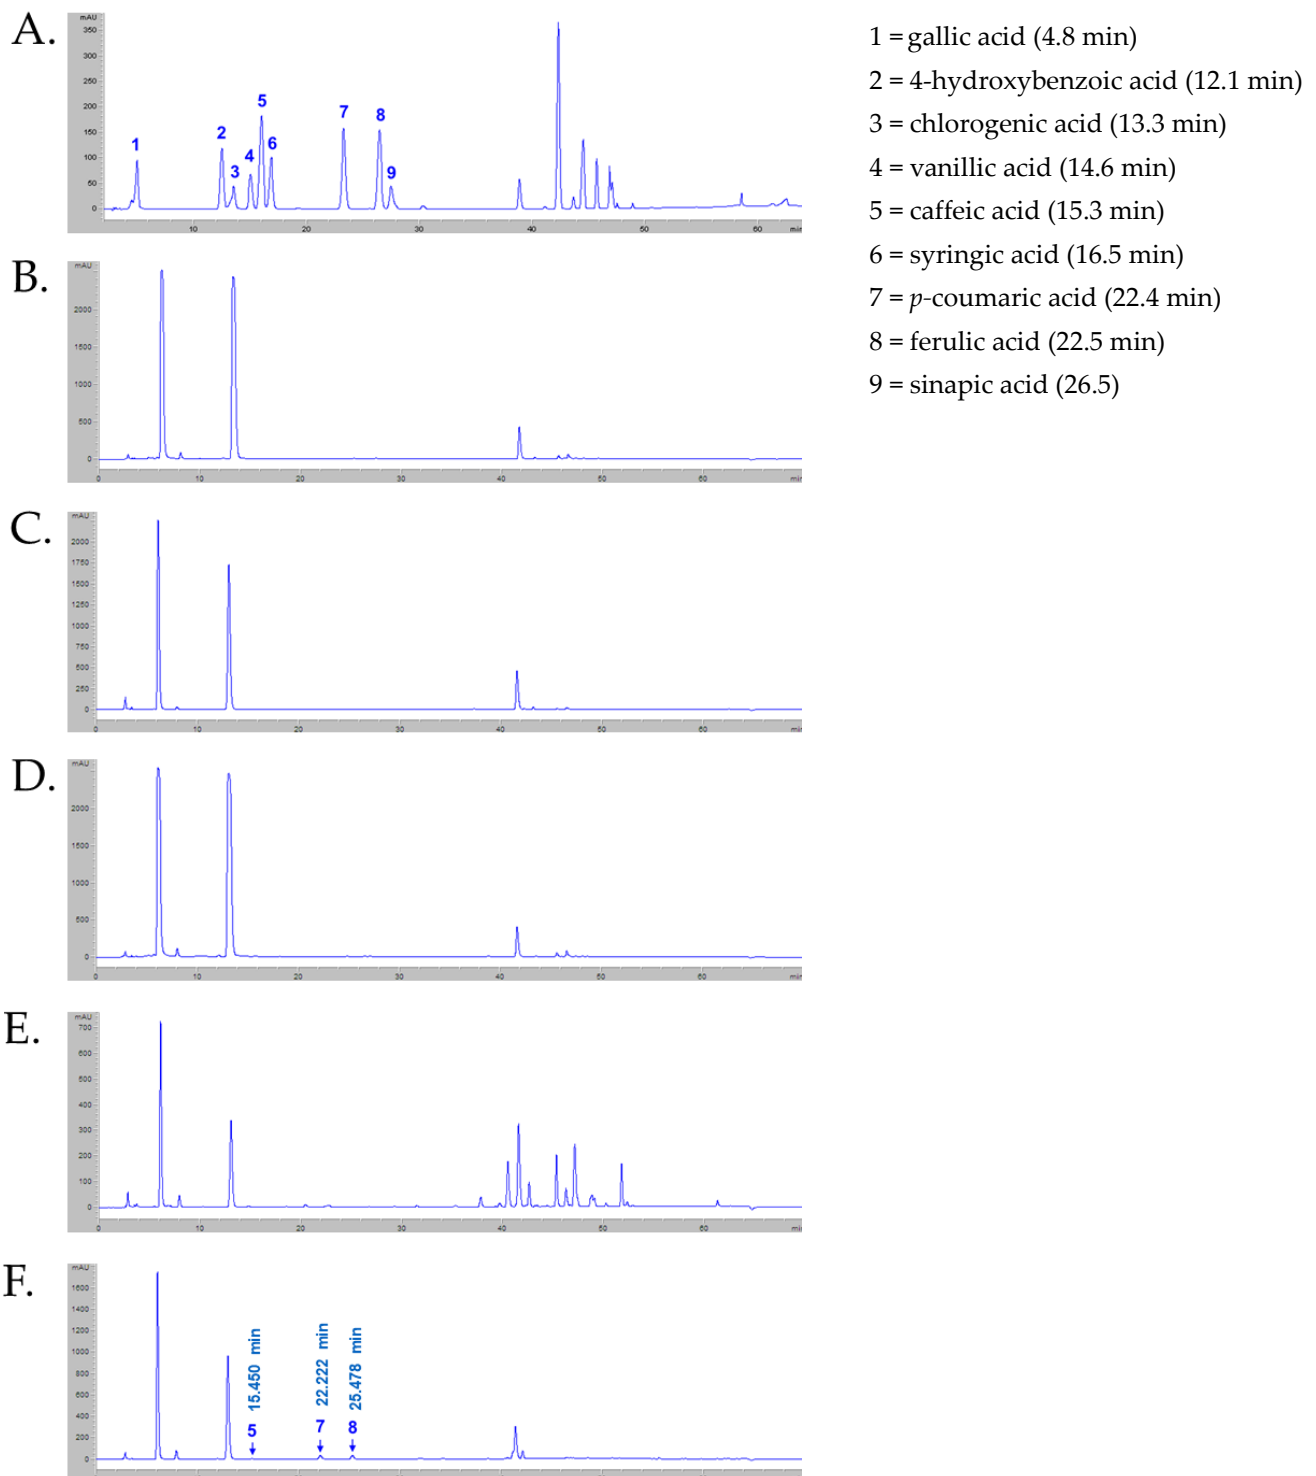



## Supplementary Figure S1 (Cont.):

High-performance liquid chromatograms showing retention time ( $R_t$ ) of (A) authentic standards including gallic acid (4.8 min), 4-hydroxybenzoic acid (12.1 min), chlorogenic acid (13.3 min), vanillic acid (14.6 min), caffeic acid (15.3 min), syringic acid (16.5 min), *p*-coumaric acid (22.4 min), ferulic acid (22.5 min) and sinapic acid (26.5 min), (B.) *A. cepa*, (C.) *A. fistulosum*, (D.) *A. sativum*, (E.) *Ci. hystrix*, (F.) *Co. sativum*, (G.) *Cy. citratus*, (H.) *E. foetidum*, (I.) *P. tetragonolobus*, (J.) *Se. pennata*, and (K.) *So. melongena* detected at 280 nm.

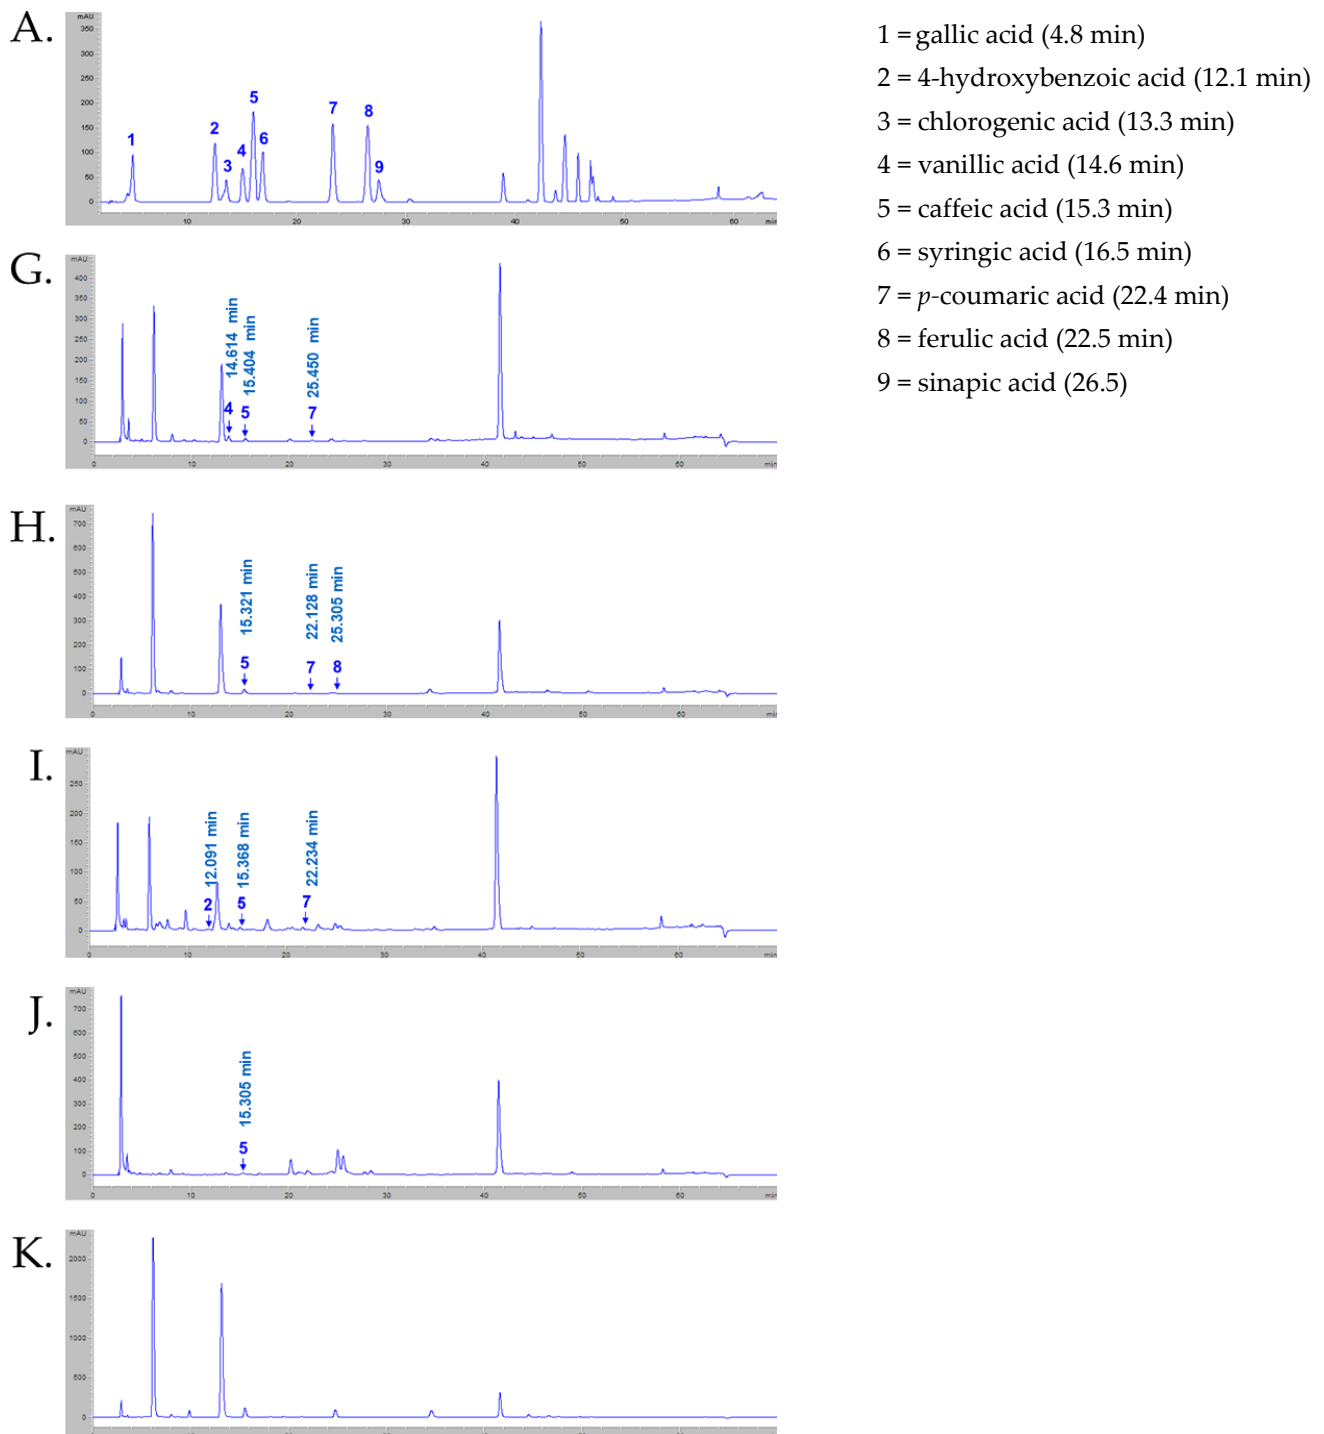

## Supplementary Figure S2:

High-performance liquid chromatograms showing retention time ( $R_t$ ) of (A) authentic standards including chlorogenic acid (13.3 min), caffeic acid (15.3 min), *p*-coumaric acid (22.2 min), ferulic acid (25.4 min), sinapic acid (26.5 min), myricetin (37.9 min), quercetin (43.1 min), luteolin (43.7 min), hesperitin (45.2 min), kaempferol (46.2 min), apigenin (46.5 min) and isorhamnetin (47.1 min), (B.) *A. cepa*, (C.) *A. fistulosum*, (D.) *A. sativum*, (E.) *Ci. hystrix*, (F.) *Co. sativum*, (G.) *Cy. citratus*, (H.) *E. foetidum*, (I.) *P. tetragonolobus*, (J.) *Se. pennata*, and (K.) *So. melongena* detected at 338 nm.

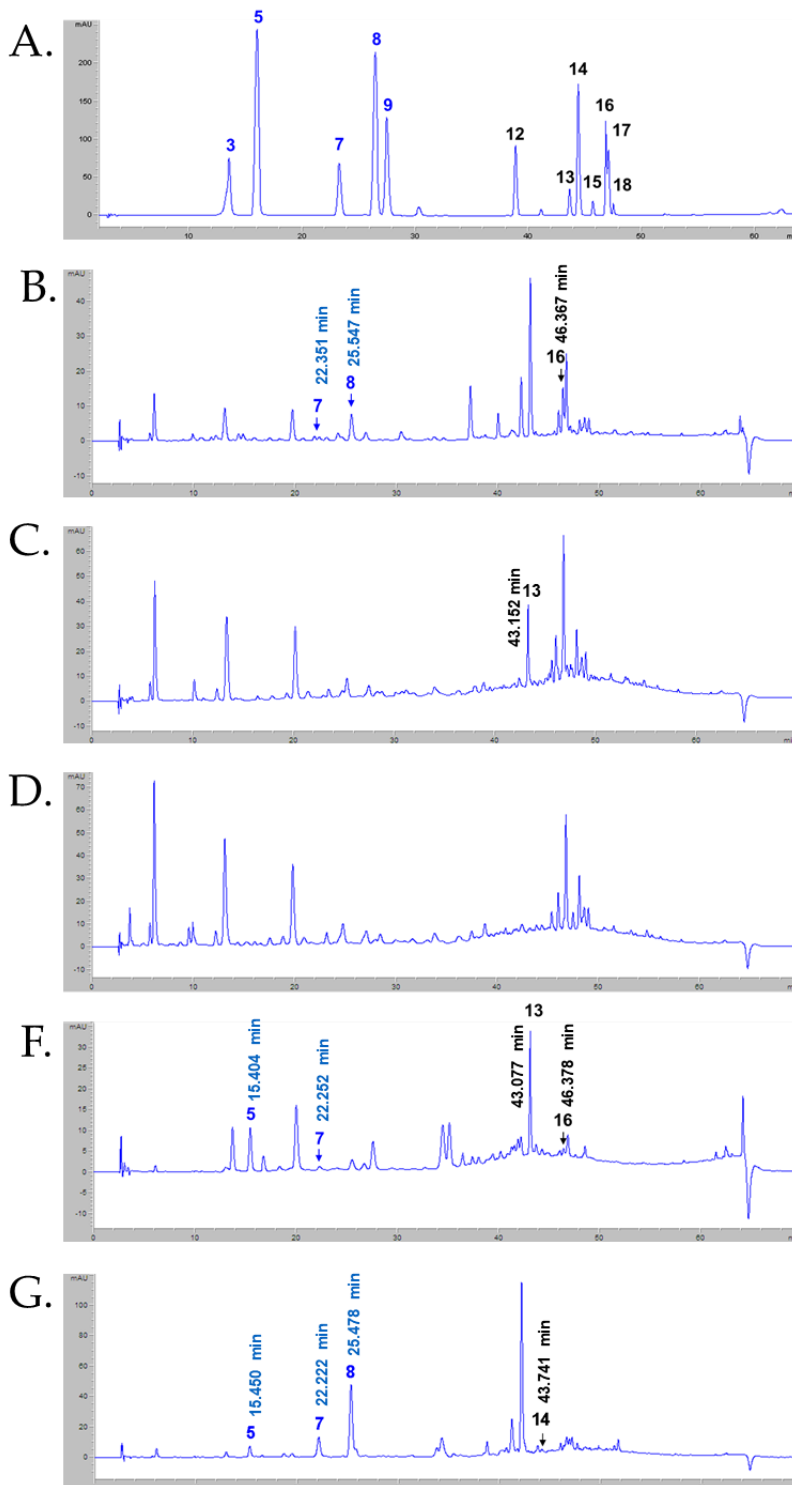

- 3 = chlorogenic acid (13.3 min)
- 5 = caffeic acid (15.3 min)
- 7 = *p*-coumaric acid (22.2 min)
- 8 = ferulic acid (25.4 min)
- 9 = sinapic acid (26.5 min)
- 12 = myricetin (37.9 min)
- 13 = quercetin (43.1 min)
- 14 = luteolin (43.7 min)
- 15 = hesperitin (45.2 min)
- 16 = kaempferol (46.2 min)
- 17 = apigenin (46.5 min)
- 18 = isorhamnetin (47.1 min)

## Supplementary Figure S2 (Cont.):

High-performance liquid chromatograms showing retention time ( $R_t$ ) of (A) authentic standards including chlorogenic acid (13.3 min), caffeic acid (15.3 min), *p*-coumaric acid (22.2 min), ferulic acid (25.4 min), sinapic acid (26.5 min), myricetin (37.9 min), quercetin (43.1 min), luteolin (43.7 min), hesperitin (45.2 min), kaempferol (46.2 min), apigenin (46.5 min) and isorhamnetin (47.1 min), (B.) *A. cepa*, (C.) *A. fistulosum*, (D.) *A. sativum*, (E.) *Ci. hystrix*, (F.) *Co. sativum*, (G.) *Cy. citratus*, (H.) *E. foetidum*, (I.) *P. tetragonolobus*, (J.) *Se. pennata*, and (K.) *So. melongena* detected at 338 nm.

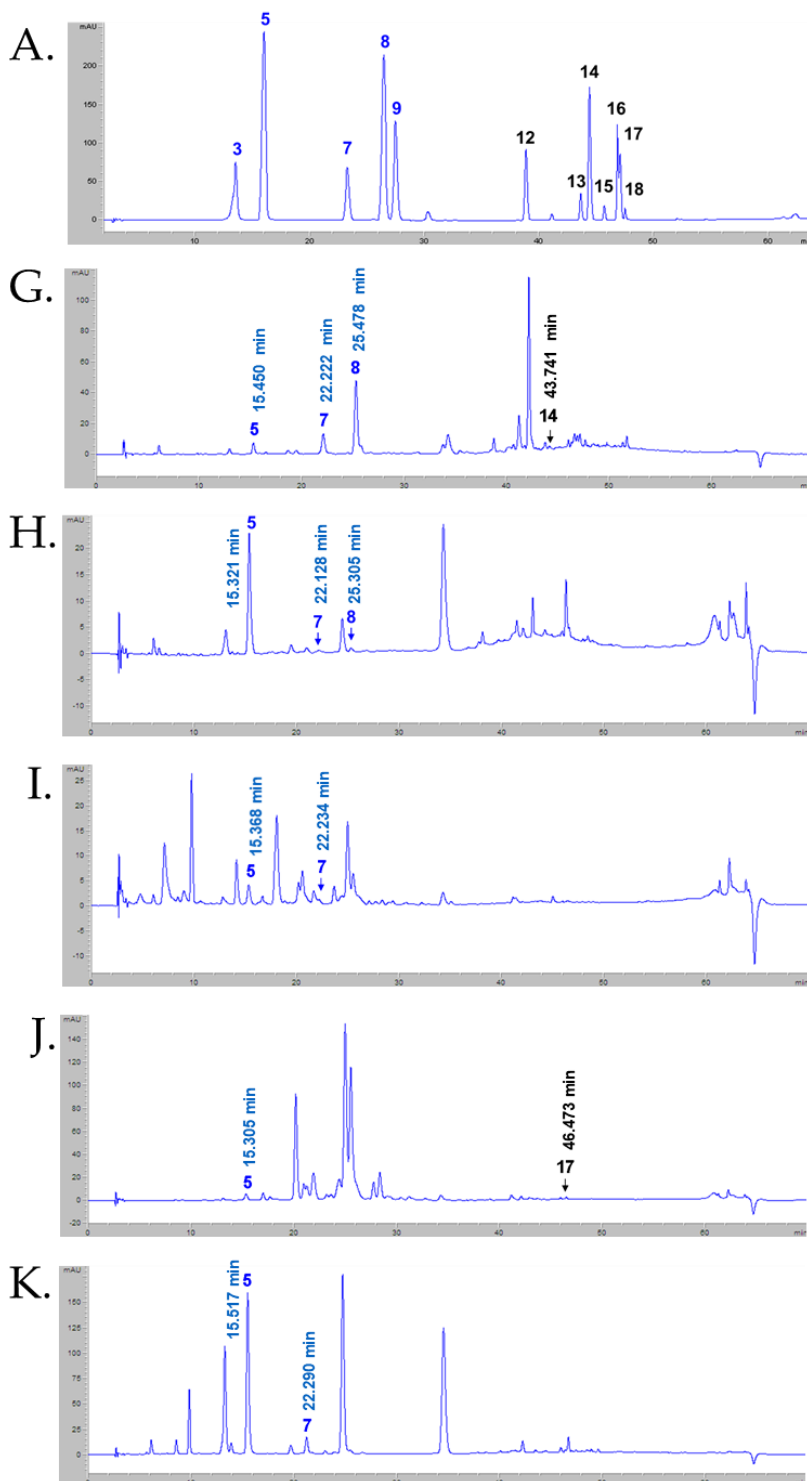

- 3 = chlorogenic acid (13.3 min)
- 5 = caffeic acid (15.3 min)
- 7 = *p*-coumaric acid (22.2 min)
- 8 = ferulic acid (25.4 min)
- 9 = sinapic acid (26.5 min)
- 12 = myricetin (37.9 min)
- 13 = quercetin (43.1 min)
- 14 = luteolin (43.7 min)
- 15 = hesperitin (45.2 min)
- 16 = kaempferol (46.2 min)
- 17 = apigenin (46.5 min)
- 18 = isorhamnetin (47.1 min)

### Supplementary Figure S3:

High-performance liquid chromatograms showing retention time ( $R_t$ ) of (A) authentic standards including delphinidin (29.0 min) and cyanidin (35.3 min), (B.) *A. cepa*, (C.) *A. fistulosum*, (D.) *A. sativum*, (E.) *Ci. hystrix*, (F.) *Co. sativum*, (G.) *Cy. citratus*, (H.) *E. foetidum*, (I.) *P. tetragonolobus*, (J.) *Se. pennata*, and (K.) *So. melongena* detected at 524 nm.

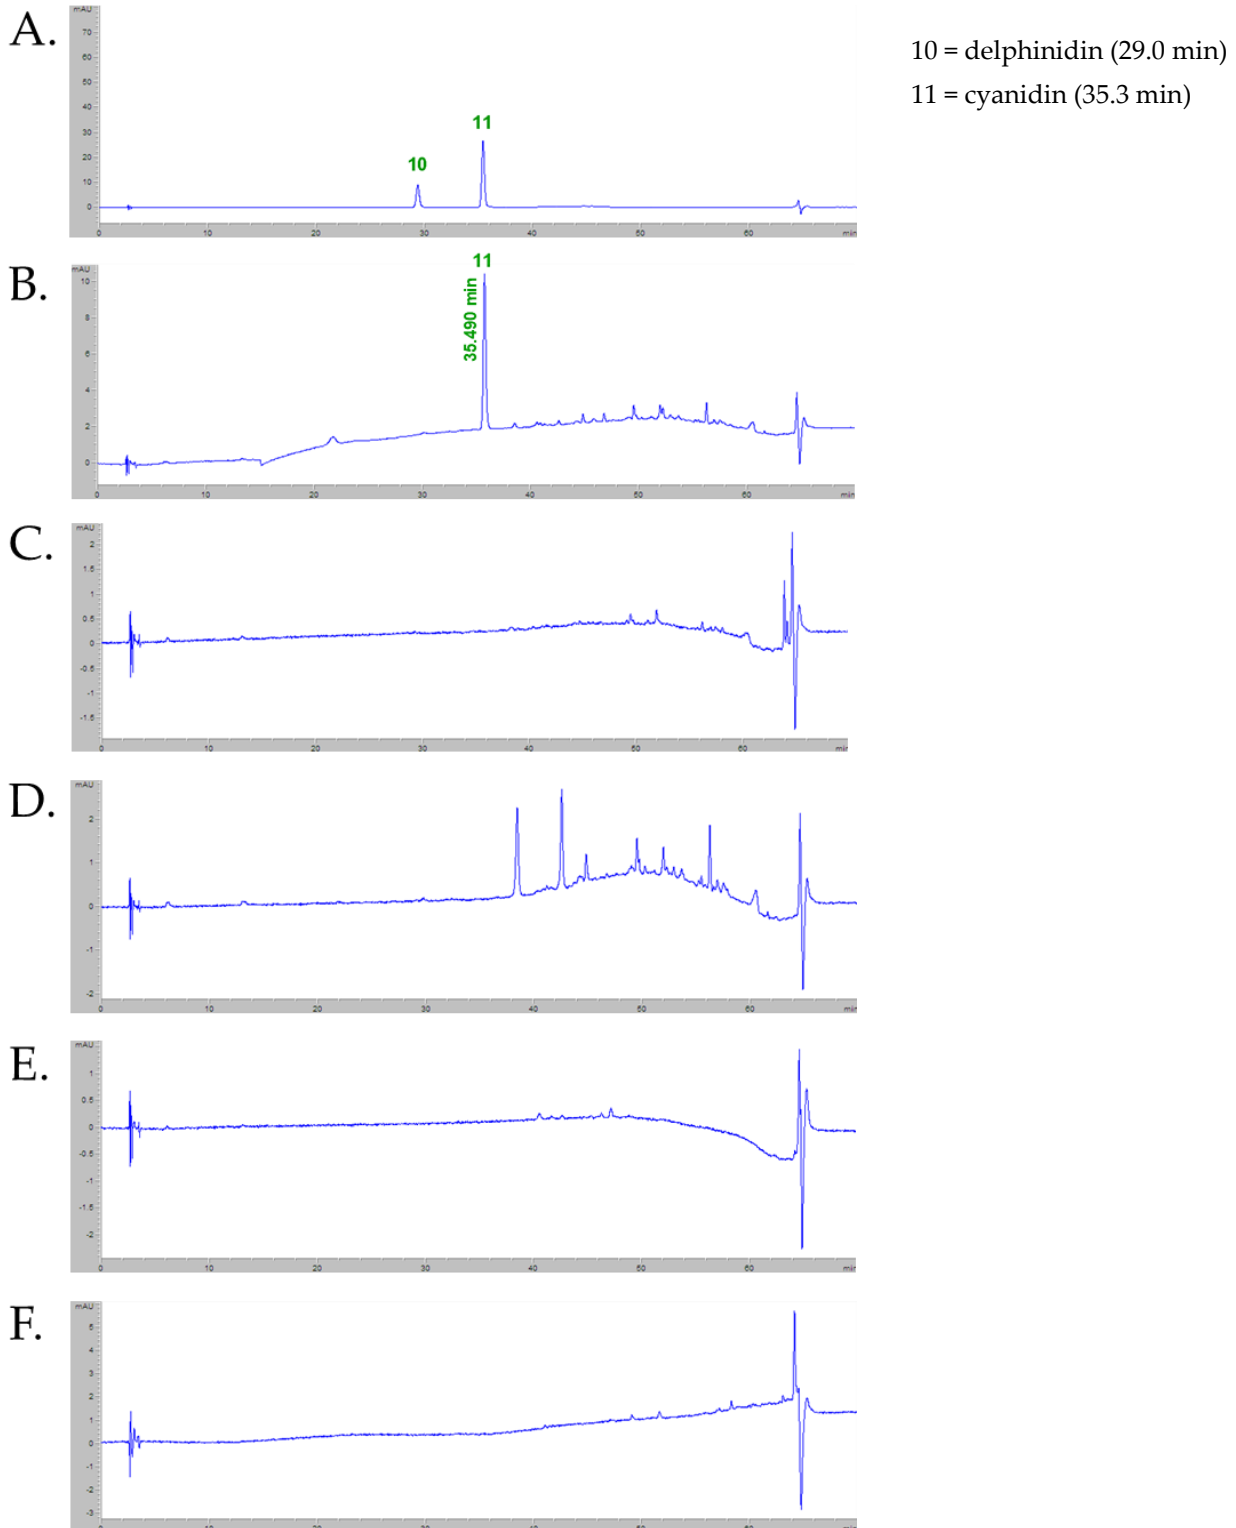

### Supplementary Figure S3 (Cont.):

High-performance liquid chromatograms showing retention time ( $R_t$ ) of (A) authentic standards including delphinidin (29.0 min) and cyanidin (35.3 min), (B.) *A. cepa*, (C.) *A. fistulosum*, (D.) *A. sativum*, (E.) *Ci. hystrix*, (F.) *Co. sativum*, (G.) *Cy. citratus*, (H.) *E. foetidum*, (I.) *P. tetragonolobus*, (J.) *Se. pennata*, and (K.) *So. melongena* detected at 524 nm.

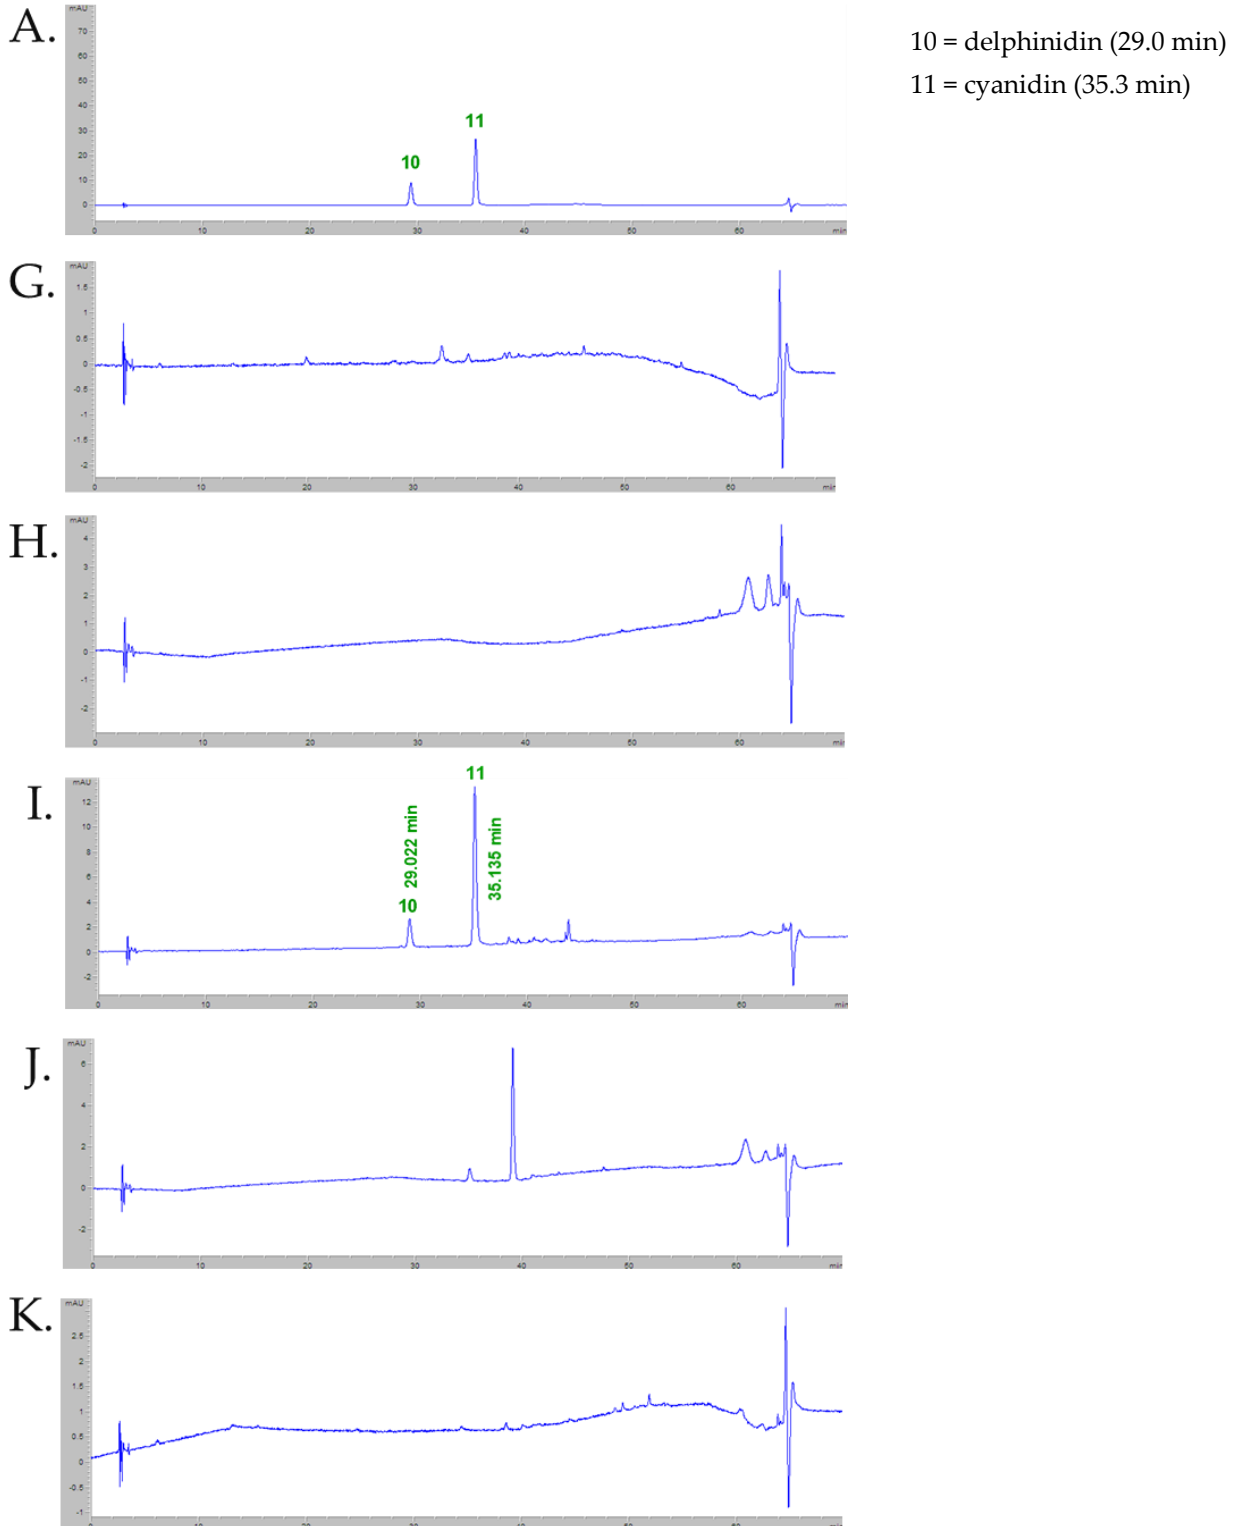

Supplement: s1 [file s1]
